# Supplementary material for: Meta-Analysis of Mutations in ALOX12B or ALOXE3 Identified in a Large Cohort of 224 Patients
Source: PubMed Central journal article supplement (PMC7826849; doi:10.3390/genes12010080), 2021-01-09
Supplement: genes-12-00080-s001.pdf [file genes-12-00080-s001.pdf]

Table S1: Identified mutations in *ALOX12B* in patients with ARCI

| Patient           | Year of birth | Sex | Origin       | Phenotype     | Nucleotid change             | Consequences of mutation<br>(amino acid level) |
|-------------------|---------------|-----|--------------|---------------|------------------------------|------------------------------------------------|
| 1 <sup>a</sup>    | 1954          | f   | France       | CB            | c.864del / c.1655-7C>A       | p.(Val289Serfs*63) / p.?                       |
| 2 <sup>a</sup>    | 1985          | m   | France       | CB            | c.2021_2022dup / c.1655-7C>A | p.(Asp675Thrfs*21) / p.?                       |
| 3                 | 1991          | m   | France       | CB            | c.1309A>T / c.1642C>T        | p.(Ile437Phe) / p.(Arg548Trp)                  |
| 4                 | 1988          | f   | France       | CB            | c.1272dup / c.2000A>C        | p.(Lys425Glnfs*24) / p.(Gln667Pro)             |
| 5                 | 1983          | f   | France       | CB            | c.1654+3A>G / c.1654+3A>G    | p.? / p.?                                      |
| 6                 | 1974          | f   | France       | CB            | c.297C>A / c.1211T>G         | p.(Phe99Leu) / p.(Leu404Arg)                   |
| 7                 | 1992          | f   | France       | CB            | c.734_745del / c.1562A>G     | p.(Gly245_Ser248del) / p.(Tyr521Cys)           |
| 8 <sup>b</sup>    | 1988          | f   | North Africa | CB            | c.1277T>C / c.1277T>C        | p.(Leu426Pro) / p.(Leu426Pro)                  |
| 9                 | 1982          | m   | France       | CB            | c.209A>C / c.845delinsAA     | p.(His70Pro) / p.(Arg282Glnfs*92)              |
| 10 <sup>c</sup>   | 1955          | m   | Algeria      | n/a           | c.526G>A / c.526G>A          | p.(Glu176Lys) / p.(Glu176Lys)                  |
| 11                | 1986          | m   | France       | CB, later CIE | c.789_791del / c.1963G>A     | p.(Phe264del) / p.(Glu655Lys)                  |
| 12                | 1995          | f   | France       | CB            | c.1642C>T / c.1669_1681del   | p.(Arg548Trp) / p.(Arg558Serfs*2)              |
| 13                | 1976          | f   | France       | CB            | c.526G>A / c.526G>A          | p.(Glu176Lys) / p.(Glu176Lys)                  |
| 14                | 1986          | f   | Italy        | CB            | c.130_131del / c.1427A>G     | p.(Asp44Leufs*19) / p.(Tyr476Cys)              |
| 15 <sup>d,e</sup> | 1993          | f   | Italy        | CB            | c.1261C>T / c.2035C>A        | p.(His421Tyr) / p.(Arg679Ser)                  |
| 16 <sup>d,e</sup> | n/a           | f   | Italy        | LI            | c.1261C>T / c.1613A>C        | p.(His421Tyr) / p.(Gln538Pro)                  |
| 17 <sup>e</sup>   | n/a           | n/a | Turkey       | n/a           | c.1180G>A / c.1180G>A        | p.(Glu394Lys) / p.(Glu394Lys)                  |
| 18 <sup>b</sup>   | n/a           | m   | Turkey       | n/a           | c.1734C>A / c.1734C>A        | p.(His578Gln) / p.(His578Gln)                  |
| 19 <sup>b</sup>   | n/a           | f   | Turkey       | n/a           | c.1389del / c.1389del        | p.Phe463Leufs*4 / p.Phe463Leufs*4              |
| 20                | n/a           | f   | Turkey       | n/a           | c.1025T>C / c.1025T>C        | p.(Leu342Pro) / p.(Leu342Pro)                  |
| 21 <sup>e</sup>   | 1993          | f   | Algeria      | n/a           | c.632_633del / c.632_633del  | p.(Phe211Cysfs*29) / p.(Phe211Cysfs*29)        |

|                 |      |     |         |               |                                     |                                                      |
|-----------------|------|-----|---------|---------------|-------------------------------------|------------------------------------------------------|
| 22              | n/a  | n/a | Algeria | n/a           | c.1579G>A / c.1579G>A               | p.(Val527Met) / p.(Val527Met)                        |
| 23 <sup>e</sup> | 1982 | f   | Morocco | CB            | c.1078C>G / c.1078C>G               | p.(Gln360Glu) / p.(Gln360Glu)                        |
| 24 <sup>e</sup> | n/a  | n/a | Algeria | n/a           | c.1579G>A / c.1579G>A               | p.(Val527Met) / p.(Val527Met)                        |
| 25              | n/a  | f   | Tunisia | CIE           | <b>c.2064C&gt;G / c.2064C&gt;G</b>  | <b>p.(Tyr688*) / p.(Tyr688*)</b>                     |
| 26              | 1995 | f   | Tunisia | CB, later CIE | c.1294C>T / c.1294C>T               | p.(Arg432*) / p.(Arg432*)                            |
| 27              | 1998 | f   | France  | CIE           | <b>c.845delinsAA / c.1694G&gt;C</b> | <b>p.(Arg282Glnfs*92) / p.(Arg565Pro)</b>            |
| 28              | 1993 | f   | Denmark | LI            | c.1562A>G / c.1562A>G               | p.(Tyr521Cys) / p.(Tyr521Cys)                        |
| 29              | n/a  | n/a | France  | n/a           | <b>c.769C&gt;G / c.769C&gt;G</b>    | <b>p.(His257Asp) / p.(His257Asp)</b>                 |
| 30              | n/a  | n/a | France  | n/a           | c.1325G>A / c.1325G>A               | p.(Arg442Gln) / p.(Arg442Gln)                        |
| 31              | 1994 | f   | Germany | n/a           | <b>c.325G&gt;T / c.1018del</b>      | <b>p.(Glu109*) / p.(Leu340Serfs*12)</b>              |
| 32              | 2005 | m   | Germany | n/a           | <b>c.47C&gt;T / c.2012del</b>       | <b>p.(Ser16Leu) / p.(Gln671Argfs*24)</b>             |
| 33              | 1992 | f   | Germany | n/a           | <b>c.771_772del / c.771_772del</b>  | <b>p.(His257Glnfs*116) /<br/>p.(His257Glnfs*116)</b> |
| 34              | 2002 | n/a | Germany | n/a           | <b>c.1609G&gt;A / c.1609G&gt;A</b>  | <b>p.(Val537Met) / p.(Val537Met)</b>                 |
| 35              | 1972 | f   | Germany | n/a           | c.1562A>G / <b>c.1861G&gt;T</b>     | p.(Tyr521Cys) / <b>p.(Asp621Tyr)</b>                 |
| 36              | 2001 | n/a | Germany | n/a           | c.1148C>T / c.1148C>T               | p.(Thr383Met) / p.(Thr383Met)                        |
| 37              | n/a  | n/a | Italy   | n/a           | c.1157G>A / c.1562A>G               | p.(Arg386His) / p.(Tyr521Cys)                        |
| 38              | n/a  | n/a | Italy   | n/a           | c.1261C>T / c.1261C>T               | p.(His421Tyr) / p.(His421Tyr)                        |
| 39              | n/a  | n/a | Italy   | n/a           | c.1821G>C / <b>c.371A&gt;T</b>      | p.(Lys607Asn) / <b>p.(Asp124Val)</b>                 |
| 40              | n/a  | n/a | Italy   | n/a           | <b>c.47C&gt;T / c.67T&gt;C</b>      | <b>p.(Ser16Leu) / p.(Ser23Pro)</b>                   |
| 41              | n/a  | n/a | Italy   | n/a           | c.1642C>T / c.1642C>T               | p.(Arg548Trp) / p.(Arg548Trp)                        |
| 42              | n/a  | n/a | Italy   | n/a           | c.1294C>T / c.1294C>T               | p.(Arg432*) / p.(Arg432*)                            |
| 43 <sup>f</sup> | n/a  | n/a | Sweden  | CIE           | c.1562A>G / c.1562A>G               | p.(Tyr521Cys) / p.(Tyr521Cys)                        |
| 44 <sup>g</sup> | n/a  | n/a | Sweden  | CIE           | c.1385G>A / c.1385G>A               | p.(Gly462Asp) / p.(Gly462Asp)                        |
| 45 <sup>g</sup> | n/a  | f   | Sweden  | SICI          | c.199A>T / c.1562A>G                | p.(Ile67Phe) / p.(Tyr521Cys)                         |
| 46 <sup>f</sup> | n/a  | n/a | Sweden  | LI            | c.1562A>G / c.1562A>G               | p.(Tyr521Cys) / p.(Tyr521Cys)                        |
| 47 <sup>g</sup> | n/a  | n/a | Sweden  | SICI          | c.1562A>G / c.1562A>G               | p.(Tyr521Cys) / p.(Tyr521Cys)                        |

|                 |      |     |         |                                                      |                                        |                                                |
|-----------------|------|-----|---------|------------------------------------------------------|----------------------------------------|------------------------------------------------|
| 48 <sup>f</sup> | n/a  | n/a | Sweden  | LI, CIE                                              | c.1562A>G / c.1562A>G                  | p.(Tyr521Cys) / p.(Tyr521Cys)                  |
| 49 <sup>s</sup> | n/a  | n/a | Sweden  | SICI                                                 | c.1562A>G / c.1562A>G                  | p.(Tyr521Cys) / p.(Tyr521Cys)                  |
| 50 <sup>s</sup> | n/a  | f   | Sweden  | LI                                                   | c.1579G>A / c.1790C>A                  | p.(Val527Met) / p.(Ala597Glu)                  |
| 51 <sup>f</sup> | n/a  | n/a | Sweden  | LI                                                   | c.1265C>T / c.1562A>G                  | p.(Pro422Leu) / p.(Tyr521Cys)                  |
| 52 <sup>s</sup> | n/a  | n/a | Denmark | LI                                                   | c.1654+3A>G / c.1654+3A>G              | p.? / p.?                                      |
| 53 <sup>f</sup> | n/a  | n/a | Denmark | n/a                                                  | c.1654+3A>G / c.1654+3A>G              | p.? / p.?                                      |
| 54              | 2003 | f   | Austria | n/a                                                  | <b>c.1926+2T&gt;G / c.1926+2T&gt;G</b> | <b>p.? / p.?</b>                               |
| 55              | 2010 | f   | Italy   | SICI                                                 | c.340C>T / <b>c.1219G&gt;A</b>         | p.(Arg114Trp) / <b>p.(Glu407Lys)</b>           |
| 56              | 2011 | m   | France  | LI                                                   | <b>c.299C&gt;T / c.1655-7C&gt;A</b>    | <b>p.(Pro100Leu) / p.?</b>                     |
| 57              | 2012 | f   | Germany | n/a                                                  | <b>c.1495C&gt;T / c.2036G&gt;T</b>     | <b>p.(Arg499Cys) / p.(Arg679Leu)</b>           |
| 58              | 2012 | m   | Germany | n/a                                                  | c.1562A>G / c.1192C>T                  | p.(Tyr521Cys) / p.(His398Tyr)                  |
| 59              | 2007 | m   | Turkey  | LI                                                   | <b>c.1594G&gt;A / c.1594G&gt;A</b>     | <b>p.(Glu532Lys) / p.(Glu532Lys)</b>           |
| 60              | 2013 | w   | Ireland | Limited collodion type skin on face                  | <b>c.1829C&gt;T / c.1936G&gt;A</b>     | <b>p.(Thr610Ile) / p.(Gly646Arg)</b>           |
| 61              | 2009 | m   | Italy   | n/a                                                  | c.1163C>T / c.1562A>G                  | p.(Ala388Val) / p.(Tyr521Cys)                  |
| 62              | 1962 | f   | Italy   | n/a                                                  | <b>c.1324C&gt;T / c.1324C&gt;T</b>     | <b>p.(Arg442Trp) / p.(Arg442Trp)</b>           |
| 63              | 2007 | w   | Italy   | n/a                                                  | <b>c.938_941dup / c.938_941dup</b>     | <b>p.(Ala316Profs*59) / p.(Ala316Profs*59)</b> |
| 64              | 2012 | w   | Germany | CB, Erythroderma with pityriasiform desquamation, LI | c.1562A>G / c.1562A>G                  | p.(Tyr521Cys) / p.(Tyr521Cys)                  |
| 65              | 2008 | w   | Ireland | LI, generalized                                      | <b>c.1498G&gt;C / c.1977del</b>        | <b>p.(Asp500His) / p.(Arg660Glyfs*3)</b>       |
| 66              | 2008 | m   | Ireland | CB. Later mild fine scaled generalized ichthyosis    | c.1405C>T / c.1405C>T                  | p.(Arg469Trp) / p.(Arg469Trp)                  |
| 67              | 1984 | w   | Turkey  | n/a                                                  | <b>c.2041A&gt;T / c.2041A&gt;T</b>     | <b>p.(Lys681*) / p.(Lys681*)</b>               |
| 68              | 2014 | m   | Germany | SICI                                                 | <b>c.1127G&gt;A / c.1294C&gt;T</b>     | <b>p.(Trp376*) / p.(Arg432*)</b>               |
| 69              | 2014 | m   | Ireland | CB with underlying erythroderma                      | c.1790C>A / <b>c.2060A&gt;G</b>        | p.(Ala597Glu) / <b>p.(Tyr687Cys)</b>           |

|    |      |   |               |                                                                                                                                  |                                        |                                           |
|----|------|---|---------------|----------------------------------------------------------------------------------------------------------------------------------|----------------------------------------|-------------------------------------------|
| 70 | 2014 | m | Germany       | CB                                                                                                                               | <b>c.1797G&gt;T / c.1797G&gt;T</b>     | <b>p.(Met599Ile) / p.(Met599Ile)</b>      |
| 71 | 2014 | m | Germany       | n/a                                                                                                                              | c.1562A>G / c.1562A>G                  | p.(Tyr521Cys) / p.(Tyr521Cys)             |
| 72 | 1997 | f | France        | SICI                                                                                                                             | c.340C>T / c.1148C>T                   | p.(Arg114Trp) / p.(Tyr383Met)             |
| 73 | 2014 | f | Germany       | CB, later mild erythroderma, pityriasiform desquamation, palmoplantar hyperlinearity                                             | c.1562A>G / c.1562A>G                  | p.(Tyr521Cys) / p.(Tyr521Cys)             |
| 74 | 2012 | f | Germany       | CIE                                                                                                                              | <b>c.938_941dup</b> / c.1192C>T        | <b>p.(Ala316Profs*59)</b> / p.(His398Tyr) |
| 75 | 2015 | f | Germany       | CB                                                                                                                               | c.1156C>T / c.1579G>A                  | p.(Arg386Cys) / p.(Val257Met)             |
| 76 | 2015 | f | Germany       | CB with ectropion                                                                                                                | c.1562A>G / c.1790C>A                  | p.(Tyr521Cys) / p.(Ala597Glu)             |
| 77 | 2015 | f | Germany       | SICI                                                                                                                             | <b>c.47C&gt;G / c.208_211dup</b>       | <b>p.(Ser16Trp) / p.(Lys71Thrfs*55)</b>   |
| 78 | 2013 | m | Germany       | SICI, folded earlobe                                                                                                             | <b>c.208_211dup</b> / c.1790C>A        | <b>p.(Lys71Thrfs*55)</b> / p.(Ala597Glu)  |
| 79 | 2015 | m | Germany       | SICI                                                                                                                             | c.1562A>G / <b>c.1871C&gt;T</b>        | p.(Tyr521Cys) / <b>p.(Thr624Ile)</b>      |
| 80 | 2008 | m | Poland/Russia | SICI, deformation of ear                                                                                                         | <b>c.2094C&gt;A / c.2094C&gt;A</b>     | <b>p.(Ser698Arg) / p.(Ser698Arg)</b>      |
| 81 | 2015 | m | Ireland       | Partial collodion membrane, severe intrauterine growth retardation, cardiomyopathy (suspected congenital order of glycosylation) | c.1405C>T / c.1562A>G                  | p.(Arg469Trp) / p.(Tyr521Cys)             |
| 82 | 1997 | f | Germany       | n/a                                                                                                                              | <b>c.353-2A&gt;G / c.1336_1338del</b>  | <b>p.? / p.(Leu446del)</b>                |
| 83 | 2016 | m | Italy         | CB                                                                                                                               | c.1192C>T / <b>c.1937dup</b>           | p.(His398Tyr) / <b>p.(His647Thrfs*50)</b> |
| 84 | 2016 | m | Greece        | n/a                                                                                                                              | <b>c.1015C&gt;G / c.1859C&gt;A</b>     | <b>p.(Pro339Ala) / p.(Pro620Gln)</b>      |
| 85 | 2016 | m | Germany       | SICI                                                                                                                             | c.1265C>T / c.1265C>T                  | p.(Pro422Leu) / p.(Pro422Leu)             |
| 86 | 1978 | m | Germany       | n/a                                                                                                                              | c.71T>C / c.1654+3A>G                  | p.(Leu24Pro) / p.?                        |
| 87 | 1967 | f | Germany       | n/a                                                                                                                              | c.71T>C / <b>c.1015C&gt;G</b>          | p.(Leu24Pro) / <b>p.(Pro339Ala)</b>       |
| 88 | 2012 | f | Germany       | LI                                                                                                                               | c.1156C>T / c.1156C>T                  | p.(Arg386Cys) / p.(Arg386Cys)             |
| 89 | 2017 | f | Germany       | CB                                                                                                                               | <b>c.307C&gt;T</b> / c.1790C>A         | <b>p.(Gln103*)</b> / p.(Ala597Glu)        |
| 90 | 1962 | f | n/a           | n/a                                                                                                                              | <b>c.1533-1G&gt;T / c.2005_2037dup</b> | <b>p.? / p.(Leu669_Arg679dup)</b>         |

|     |      |   |         |                                                                                |                                      |                                      |
|-----|------|---|---------|--------------------------------------------------------------------------------|--------------------------------------|--------------------------------------|
| 91  | 2000 | f | n/a     | n/a                                                                            | c.1630T>C / c.1630T>C                | p.(Cys544Arg) / p.(Cys544Arg)        |
| 92  | 1998 | m | n/a     | n/a                                                                            | c.1148C>T / c.1790C>A                | p.(Thr383Met) / p.(Ala597Glu)        |
| 93  | 1991 | m | Poland  | no CB                                                                          | c.1562A>G / c.1562A>G                | p.(Tyr521Cys) / p.(Tyr521Cys)        |
| 94  | 2017 | m | n/a     | CB                                                                             | c.1163C>T / c.1163C>T                | p.(Ala388Val) / p.(Ala388Val)        |
| 95  | 2015 | m | n/a     | CB                                                                             | <b>c.1495C&gt;T / c.1495C&gt;T</b>   | <b>p.(Arg499Cys) / p.(Arg499Cys)</b> |
| 96  | 2006 | f | n/a     | n/a                                                                            | <b>c.928-1G&gt;C / c.1562A&gt;G</b>  | <b>p.? / p.(Tyr521Cys)</b>           |
| 97  | 1993 | m | Germany | CB, later generalized fine lamellar ichthyosis, generalized Erythroderma       | <b>c.1336_1338del / c.1562A&gt;G</b> | <b>p.(Leu446del) / p.(Tyr521Cys)</b> |
| 98  | 1995 | m | Germany | Mild Erythroderma with mild lamellar ichthyosis, mild PPK                      | <b>c.698G&gt;A / c.1562A&gt;G</b>    | <b>p.(Trp233*) / p.(Tyr521Cys)</b>   |
| 99  | 2013 | m | Syria   | CIE at birth with folded earlobe and strong lichenification, mild erythroderma | c.1579G>A / c.1579G>A                | p.(Val527Met) / p.(Val527Met)        |
| 100 | 1989 | m | Germany | CB, ectropion and eclabion, improving (SICI)                                   | c.1790C>A / c.1790C>A                | p.(Ala597Glu) / p.(Ala597Glu)        |
| 101 | 2004 | m | Serbia  | CB, later mild erythroderma with palmar hyperkeratosis                         | c.1562A>G / c.1562A>G                | p.(Tyr521Cys) / p.(Tyr521Cys)        |
| 102 | 2019 | m | Germany | Ectropion ab birth                                                             | c.1562A>G / c.1562A>G                | p.(Tyr521Cys) / p.(Tyr521Cys)        |
| 103 | 2019 | m | Germany | n/a                                                                            | c.1562A>G / c.1562A>G                | p.(Tyr521Cys) / p.(Tyr521Cys)        |
| 104 | 2019 | f | Germany | CB, improving (SICI)                                                           | <b>c.1258T&gt;G / c.1562A&gt;G</b>   | <b>p.(Cys420Gly) / p.(Tyr521Cys)</b> |
| 105 | 2019 | m | n/a     | CB                                                                             | c.1562A>G / c.1790C>A                | p.(Tyr521Cys) / p.(Ala597Glu)        |
| 106 | 1990 | f | Germany | no CB, fine lamellar ichthyosis from birth                                     | c.340C>T / c.1562A>G                 | p.(Arg114Trp) / p.(Tyr521Cys)        |
| 107 | 2007 | m | n/a     | n/a                                                                            | <b>c.341G&gt;A / c.341G&gt;A</b>     | <b>p.(Arg114Gln) / p.(Arg114Gln)</b> |

|                  |      |     |                |                                  |                                               |                                                       |
|------------------|------|-----|----------------|----------------------------------|-----------------------------------------------|-------------------------------------------------------|
| 108 <sup>h</sup> | 2006 | m   | Turkey         | CB, later CIE, improved with age | c.1463G>A / c.1463G>A                         | p.(Arg488His) / p.(Arg488His)                         |
| 109 <sup>h</sup> | 2010 | f   | Turkey         | CB, later CIE                    | c.1463G>A / c.1463G>A                         | p.(Arg488His) / p.(Arg488His)                         |
| 110 <sup>h</sup> | 2016 | f   | Serbia         | CB, later CIE                    | c.1562A>G / c.1562A>G                         | p.(Tyr521Cys) / p.(Tyr521Cys)                         |
| 111 <sup>h</sup> | 2017 | m   | Austria        | CB, later CIE                    | c.1562A>G / c.1562A>G                         | p.(Tyr521Cys) / p.(Tyr521Cys)                         |
| 112 <sup>h</sup> | 1988 | m   | Austria        | CB, later LI                     | c.467_470dup / c.938T>C                       | p.(His158Cysfs*20) / <b>p.(Ile313Thr)</b>             |
| 113 <sup>h</sup> | 1995 | f   | Austria        | CB, later CIE                    | c.1562A>G / c.1787C>T                         | p.(Tyr521Cys) / <b>p.(Pro596Leu)</b>                  |
| 114 <sup>h</sup> | 2018 | f   | Austria        | CB, later CIE                    | <b>c.1676C&gt;T</b> / c.1562A>G               | <b>p.(Thr559Ile)</b> / p.(Tyr521Cys)                  |
| 115 <sup>h</sup> | 2016 | f   | Turkey         | CB, later CIE                    | c.1071+1dup / c.1071+1dup                     | p.? / p.?                                             |
| 116 <sup>h</sup> | 2019 | f   | Austria        | CB, later CIE                    | c.1562A>G / c.1790C>A                         | p.(Tyr521Cys) / p.(Ala597Glu)                         |
| 117 <sup>i</sup> | 1981 | m   | Kurdish        | n/a                              | <b>c.195_220del26</b> / <b>c.195_220del26</b> | <b>p.(Ile66Argfs*50)</b> / <b>p.(Ile66Argfs*50)</b>   |
| 118 <sup>j</sup> | 1986 | m   | Finland        | CB                               | c.1562A>G / c.1562A>G                         | p.(Tyr521Cys) / p.(Tyr521Cys)                         |
| 119 <sup>j</sup> | 1989 | f   | Ukraine        | No CB, only erythroderma         | c.1562A>G / c.1562A>G                         | p.(Tyr521Cys) / p.(Tyr521Cys)                         |
| 120 <sup>j</sup> | 2009 | m   | Russia         | n/a                              | c.1562A>G / c.1790C>A                         | p.(Tyr521Cys) / p.(Ala597Glu)                         |
| 121 <sup>k</sup> | 2006 | f   | France         | CB                               | c.1350del / c.1562A>G                         | p.(Leu451Serfs*16) / p.(Tyr521Cys)                    |
| 122 <sup>k</sup> | 2005 | m   | France         | CB                               | c.1562A>G / <b>c.2036G&gt;A</b>               | p.(Tyr521Cys) / <b>p.(Arg679His)</b>                  |
| 123 <sup>k</sup> | 2011 | F   | France         | CB                               | <b>c.1634T&gt;G</b> / <b>c.1742T&gt;G</b>     | <b>p.(Leu545Arg)</b> / <b>p.(Val581Gly)</b>           |
| 124 <sup>k</sup> | 1995 | F   | Romania        | CB                               | c.1562A>G / c.1790C>A                         | p.(Tyr521Cys) / p.(Ala597Glu)                         |
| 125 <sup>k</sup> | 1995 | n/a | Romania        | CB                               | <b>c.1071+1G&gt;C</b> / c.1562A>G             | <b>p.?</b> / p.(Tyr521Cys)                            |
| 126 <sup>k</sup> | 1983 | f   | Algeria/France | CB                               | <b>c.58G&gt;T</b> / c.1463G>A                 | <b>p.(Asp20Tyr)</b> / p.(Arg488His)                   |
| 127 <sup>k</sup> | 2017 | f   | France         | CB                               | <b>c.371A&gt;T</b> / <b>c.864del</b>          | <b>p.(Asp124Val)</b> / <b>p.(Val289Serfs*63)</b>      |
| 128 <sup>k</sup> | 2015 | m   | Turkey         | CB                               | <b>c.793G&gt;A</b> / c.1562A>G                | <b>p.(Gly265Arg)</b> / p.(Tyr521Cys)                  |
| 129 <sup>k</sup> | 2018 | f   | France         | CB                               | <b>c.893T&gt;C</b> / <b>c.893T&gt;C</b>       | <b>p.(Leu298Pro)</b> / <b>p.(Leu298Pro)</b>           |
| 130 <sup>l</sup> | 2014 | f   | Spain          | n/a                              | c.1272dup / c.1272dup                         | p.(Lys425Glnfs*24) / p.(Lys425Glnfs*24)               |
| 131 <sup>l</sup> | 2012 | f   | Spain          | n/a                              | c.1272dup / <b>c.1594G&gt;A</b>               | p.(Lys425Glnfs*24) / <b>p.(Glu532Lys)</b>             |
| 132 <sup>l</sup> | 2015 | f   | Spain          | n/a                              | <b>c.416_417del</b> / <b>c.416_417del</b>     | <b>p.(Ala139Glufs*37)</b> / <b>p.(Ala139Glufs*37)</b> |
| 133 <sup>l</sup> | 2007 | f   | Spain          | n/a                              | c.1562A>G / <b>c.814G&gt;T</b>                | p.(Tyr521Cys) / <b>p.(Val272Phe)</b>                  |

|                    |      |     |           |     |                                      |                                          |
|--------------------|------|-----|-----------|-----|--------------------------------------|------------------------------------------|
| 134 <sup>l</sup>   | 1975 | m   | Spain     | n/a | <b>c.1732C&gt;T / c.1732C&gt;T</b>   | <b>p.(His578Tyr) / p.(His578Tyr)</b>     |
| 135 <sup>m</sup>   | 1995 | f   | Macedonia | CB  | <b>c.1349G&gt;A / c.1369T&gt;C</b>   | <b>p.(Gly450Glu) / p.(Ser457Pro)</b>     |
| 136 <sup>m</sup>   | 2015 | m   | Italy     | CB  | <b>c.353-2A&gt;G / c.527+1G&gt;A</b> | <b>p.? / p.?</b>                         |
| 137 <sup>m</sup>   | 2005 | n/a | Italy     | CB  | <b>c.47C&gt;T / c.47C&gt;T</b>       | <b>p.(Ser16Leu) / p.(Ser16Leu)</b>       |
| 138 <sup>m,n</sup> | 2008 | n/a | Italy     | CB  | <b>c.47C&gt;T / c.47C&gt;T</b>       | <b>p.(Ser16Leu) / p.(Ser16Leu)</b>       |
| 139 <sup>m</sup>   | 2007 | n/a | Italy     | CB  | <b>c.47C&gt;T / c.938_941dup</b>     | <b>p.(Ser16Leu) / p.(Ala316Profs*59)</b> |
| 140 <sup>m</sup>   | 2010 | n/a | Italy     | CB  | <b>c.1562A&gt;G / c.1654+1G&gt;A</b> | <b>p.(Tyr521Cys) / p.?</b>               |
| 141 <sup>m</sup>   | 2013 | n/a | Italy     | CB  | <b>c.353-2A&gt;G / c.1057C&gt;A</b>  | <b>p.? / p.(Pro353Thr)</b>               |

<sup>a,d</sup>two branches of the same family, <sup>b</sup>previously published in Jobard *et al.* (2002), <sup>c</sup>patient is identical with patient 5 in Table S2, <sup>e</sup>previously published in Leseur *et al.* (2007), <sup>f</sup>previously published in Pigg *et al.* (2016), <sup>g</sup>previously published in Vahlquist *et al.* (2010), <sup>h</sup>patients contributed by R. G. and M. S., <sup>i</sup>patient contributed by v. d. A. and M. C. B., <sup>j</sup>patients contributed by K. H.-M., <sup>k</sup>patients contributed by J. M.-H. and N. J., <sup>l</sup>patients contributed by A. H.-M., <sup>m</sup>patients contributed by S. G. and M. B., <sup>n</sup>this patient carries additionally a 22qter deletion. In bold: novel mutations, CB: collodion baby, LI: lamellar ichthyosis, SICI: self-improving collodion ichthyosis, PPK: palmoplantar hyperkeratosis

Table S2: Identified mutations in *ALOXE3* in patients with ARCI

| Patient           | Year of birth | Sex | Origin  | Phenotype | Nucleotid change                                     | Consequences of mutation<br>(amino acid level) |
|-------------------|---------------|-----|---------|-----------|------------------------------------------------------|------------------------------------------------|
| 1                 | 1984          | f   | France  | n/a       | c.1889C>T / c.1889C>T                                | p.(Pro630Leu) / p.(Pro630Leu)                  |
| 2 <sup>a</sup>    | n/a           | n/a | Turkey  | n/a       | c.1498G>T / c.1498G>T                                | p.(Val500Phe) / p.(Val500Phe)                  |
| 3 <sup>a</sup>    | 1977          | m   | France  | n/a       | c.700C>T / c.700C>T                                  | p.(Arg234*) / p.(Arg234*)                      |
| 4                 | 1986          | m   | France  | n/a       | c.1889C>T / c.1889C>T                                | p.(Pro630Leu) / p.(Pro630Leu)                  |
| 5 <sup>b</sup>    | 1955          | m   | Algeria | n/a       | <b>c.1193C&gt;T / c.1193C&gt;T</b>                   | <b>p.(Ser398Phe) / p.(Ser398Phe)</b>           |
| 6                 | 1958          | f   | France  | n/a       | <b>c.1786-2A&gt;G</b> / c.1889C>T                    | <b>p.?</b> / p.(Pro630Leu)                     |
| 7 <sup>a</sup>    | 1993          | f   | Morocco | n/a       | c.1186C>A / c.1186C>A                                | p.(Arg396Ser) / p.(Arg396Ser)                  |
| 8                 | n/a           | m   | Italy   | n/a       | <b>c.758del</b> / c.1889C>T                          | <b>p.(Phe253Serfs*27)</b> / p.(Pro630Leu)      |
| 9                 | 1984          | f   | Tunisia | n/a       | <b>c.957G&gt;A / c.957G&gt;A</b>                     | <b>p.(Glu319=) / p.(Glu319=)</b>               |
| 10                | 2000          | f   | Denmark | n/a       | c.327C>A / c.1889C>T                                 | p.(Cys109*) / p.(Pro630Leu)                    |
| 11                | 1935          | f   | Germany | LI        | <b>c.1803_1804dup</b> / c.700C>T                     | <b>p.(Met602Asnfs*30)</b> / p.(Arg234*)        |
| 12                | 1995          | f   | Germany | n/a       | <b>c.1786-63_1807del</b> / <b>c.1786-63_1807del</b>  | <b>p.?</b> / <b>p.?</b>                        |
| 13                | 1967          | f   | Germany | LI        | c.700C>T / c.700C>T                                  | p.(Arg234*) / p.(Arg234*)                      |
| 14                | 1988          | m   | Germany | n/a       | c.700C>T / c.700C>T                                  | p.(Arg234*) / p.(Arg234*)                      |
| 15 <sup>c</sup>   | n/a           | n/a | Sweden  | n/a       | c.353-1G>C / c.1889C>T                               | p.?                                            |
| 16 <sup>c</sup>   | n/a           | n/a | Sweden  | n/a       | c.631C>T / c.1889C>T                                 | p.(Arg211*) / p.(Pro630Leu)                    |
| 17 <sup>c,d</sup> | n/a           | n/a | Sweden  | n/a       | c.1280T>C / c.1280T>C                                | p.(Leu427Pro) / p.(Leu427Pro)                  |
| 18 <sup>c,d</sup> | n/a           | m   | Sweden  | n/a       | c.700C>T / c.1889C>T                                 | p.Arg234* / p.(Pro630Leu)                      |
| 19 <sup>c</sup>   | n/a           | n/a | Sweden  | n/a       | c.1305+1_1305+2delinsTA /<br>c.1305+1_1305+2delinsTA | p.?                                            |
| 20 <sup>c</sup>   | 1967          | f   | Denmark | LI/CIE    | c.1889C>T / c.1889C>T                                | p.(Pro630Leu) / p.(Pro630Leu)                  |
| 21 <sup>c</sup>   | 1999          | f   | Denmark | CIE       | c.700C>T / c.1889C>T                                 | p.(Arg234*) / p.(Pro630Leu)                    |
| 22 <sup>c</sup>   | 1973          | f   | Denmark | CIE       | c.631C>T / c.1889C>T                                 | p.(Arg211*) / p.(Pro630Leu)                    |



|                 |      |   |         |                                                       |                           |                                          |
|-----------------|------|---|---------|-------------------------------------------------------|---------------------------|------------------------------------------|
| 23 <sup>c</sup> | 1985 | f | Denmark | LI/CIE                                                | c.327C>A / c.1889C>T      | p.(Cys109*) / p.(Pro630Leu)              |
| 24              | 2010 | m | Germany | SICI                                                  | c.700C>T / c.1889C>T      | p.(Arg234*) / p.(Pro630Leu)              |
| 24              | 1997 | f | Germany | SICI                                                  | c.1889C>T / c.1889C>T     | p.(Pro630Leu) / p.(Pro630Leu)            |
| 26              | 2010 | f | n/a     | no CB, erythroderma and desquamation at birth         | c.38_41del / c.952dup     | p.(Tyr13*) / p.(Leu318Profs*58)          |
| 27              | 2006 | m | Germany | SICI                                                  | c.57_63del / c.1889C>T    | p.(Asp20Serfs*17) / p.(Pro630Leu)        |
| 28              | 2013 | m | Germany | SICI                                                  | c.397A>G / c.1812T>A      | p.(Arg133Gly) / p.(Asn604Lys)            |
| 29              | 2003 | m | France  | n/a                                                   | c.271G>T / c.271G>T       | p.(Glu91*) / p.(Glu91*)                  |
| 30              | 2009 | f | Germany | n/a                                                   | c.1889C>T / c.1889C>T     | p.(Pro630Leu) / p.(Pro630Leu)            |
| 31              | 2012 | f | Germany | n/a                                                   | c.1889C>T / c.1889C>T     | p.(Pro630Leu) / p.(Pro630Leu)            |
| 32              | 1992 | f | France  | no CB                                                 | c.1889C>T / c.1889C>T     | p.(Pro630Leu) / p.(Pro630Leu)            |
| 33              | 2008 | m | Germany | Fine white ichthyosis, bend in the ear, short fingers | c.700C>T c.700C>T         | p.(Arg234*) / p.(Arg234*)                |
| 34              | 2007 | f | Germany | SICI                                                  | c.1889C>T / c.1889C>T     | p.(Pro630Leu) / p.(Pro630Leu)            |
| 35              | 1984 | f | France  | CB                                                    | c.957G>A / c.957G>A       | p.(Glu319=) / p.(Glu319=)                |
| 36              | 2014 | f | n/a     | blisters at birth                                     | c.680+1G>A / c.680+1G>A   | p.? / p.?                                |
| 37              | 2017 | m | Germany | CB                                                    | c.1812T>A / c.1889C>T     | p.(Asn604Lys) / p.(Pro630Leu)            |
| 38              | 2017 | f | Germany | n/a                                                   | c.1061G>A / c.1889C>T     | p.(Trp354*) / p.(Pro630Leu)              |
| 39              | 1963 | m | Germany | n/a                                                   | c.1889C>T / c.1889C>T     | p.(Pro630Leu) / p.(Pro630Leu)            |
| 40              | 1987 | f | Germany | n/a                                                   | c.833A>G / c.1292dup      | p.(Tyr278Ser) / p.(His431Glnfs*90)       |
| 41              | 1988 | f | Germany | n/a                                                   | c.1889C>T / c.1889C>T     | p.(Pro630Leu) / p.(Pro630Leu)            |
| 42              | 2007 | m | Germany | n/a                                                   | c.1889C>T / c.1889C>T     | p.(Pro630Leu) / p.(Pro630Leu)            |
| 43              | 1977 | f | Germany | n/a                                                   | c.700C>T / c.1889C>T      | p.(Arg234*) / p.(Pro630Leu)              |
| 44              | 2004 | f | Germany | n/a                                                   | c.700C>T / c.1889C>T      | p.(Arg234*) / p.(Pro630Leu)              |
| 45              | 1992 | f | Germany | n/a                                                   | c.1889C>T / c.1889C>T     | p.(Pro630Leu) / p.(Pro630Leu)            |
| 46              | 1980 | m | Germany | n/a                                                   | c.631C>T / c.1031_1039del | p.(Arg211*) / p.(Gln344_Ala347delinsPro) |

|                 |      |   |                 |                                                   |                                           |                                             |
|-----------------|------|---|-----------------|---------------------------------------------------|-------------------------------------------|---------------------------------------------|
| 47              | 1994 | m | Germany         | n/a                                               | c.38_41del / c.700C>T                     | p.(Tyr13*) / p.(Arg234*)                    |
| 48              | 1994 | f | Germany         | CIE at birth, no CB                               | c.1889C>T / c.1889C>T                     | p.(Pro630Leu) / p.(Pro630Leu)               |
| 49              | 2017 | m | Germany         | no CB, initial diagnosis IV                       | c.631C>T / c.1889C>T                      | p.(Arg211*) / p.(Pro630Leu)                 |
| 50              | 2012 | m | Germany         | no CB, initial diagnosis IV/XLI                   | c.1889C>T / c.1889C>T                     | p.(Pro630Leu) / p.(Pro630Leu)               |
| 51              | 2018 | m | Germany         | n/a                                               | c.700C>T / c.700C>T                       | p.(Arg234*) / p.(Arg234*)                   |
| 52              | 2012 | m | Germany         | no CB, initial diagnosis XLI                      | c.700C>T / c.1889C>T                      | p.(Arg234*) / p.(Pro630Leu)                 |
| 53              | 1998 | f | Germany         | no CB, initial diagnosis IV                       | <b>c.1061G&gt;A</b> / c.1889C>T           | <b>p.(Trp354*)</b> / p.(Pro630Leu)          |
| 54              | 1995 | f | Germany         | n/a                                               | <b>c.1292dup</b> / c.1889C>T              | <b>p.(His431Glnfs*90)</b> / p.(Pro630Leu)   |
| 55              | 1996 | f | Germany         | no CB, erythroderma and desquamation at birth     | c.1889C>T / c.1889C>T                     | p.(Pro630Leu) / p.(Pro630Leu)               |
| 56              | 1992 | f | Romania         | SICI                                              | <b>c.923T&gt;C</b> / c.1889C>T            | <b>p.(Leu308Pro)</b> / p.(Pro630Leu)        |
| 57              | 2010 | f | Germany         | CB, later mild erythroderma and mild desquamation | c.700C>T / c.1889C>T                      | p.(Arg234*) / p.(Pro630Leu)                 |
| 58              | 2016 | m | Ukraine         | LI at birth                                       | c.700C>T / c.700C>T                       | p.(Arg234*) / p.(Arg234*)                   |
| 59              | 1989 | w | Germany         | n/a                                               | c.700C>T / c.700C>T                       | p.(Arg234*) / p.(Arg234*)                   |
| 60              | 1987 | m | Northern Europe | CB                                                | c.1889C>T / c.1889C>T                     | p.(Pro630Leu) / p.(Pro630Leu)               |
| 61              | 2018 | f | Germany         | n/a                                               | c.700C>T / c.1889C>T                      | p.(Arg234*) / p.(Pro630Leu)                 |
| 62              | 2020 | m | Germany         | SICI                                              | c.700C>T / c.1889C>T                      | p.(Arg234*) / p.(Pro630Leu)                 |
| 63              | 1972 | f | Germany         | n/a                                               | c.1889C>T / c.1889C>T                     | p.(Pro630Leu) / p.(Pro630Leu)               |
| 64 <sup>e</sup> | 1981 | m | Turkey          | CIE, no CB                                        | <b>c.1954C&gt;T</b> / <b>c.1954C&gt;T</b> | <b>p.(Gln652*)</b> / <b>p.(Gln652*)</b>     |
| 65 <sup>e</sup> | 2012 | m | Austria         | CIE, no CB                                        | c.700C>T / c.1889C>T                      | p.(Arg234*) / p.(Pro630Leu)                 |
| 66 <sup>e</sup> | 2017 | f | Austria         | CIE, no CB                                        | <b>c.1031A&gt;C</b> / <b>c.1031A&gt;C</b> | <b>p.(Gln344Pro)</b> / <b>p.(Gln344Pro)</b> |

|                 |      |   |             |                                             |                                        |                                                |
|-----------------|------|---|-------------|---------------------------------------------|----------------------------------------|------------------------------------------------|
| 67 <sup>e</sup> | 1971 | m | Austria     | CB                                          | c.700C>T / c.700C>T                    | p.(Arg234*) / p.(Arg234*)                      |
| 68 <sup>e</sup> | 1959 | f | Austria     | CIE, no CB                                  | <b>c.1937_1944del / c.1937_1944del</b> | <b>p.(Ser646Thrfs*13) / p.(Ser646Thrfs*13)</b> |
| 69 <sup>e</sup> | 1988 | f | Austria     | Mild CB, generalized fine to medium scaling | c.700C>T / c.1889C>T                   | p.(Arg234*) / p.(Pro630Leu)                    |
| 70 <sup>e</sup> | 2014 | f | Austria     | CIE, no CB                                  | c.700C>T / c.1889C>T                   | p.(Arg234*) / p.(Pro630Leu)                    |
| 71 <sup>e</sup> | 2000 | f | Turkey      | CIE, no CB                                  | <b>c.1393-1G&gt;A / c.1393-1G&gt;A</b> | <b>p.? / p.?</b>                               |
| 72 <sup>e</sup> | 2002 | m | Turkey      | CIE, no CB                                  | <b>c.1393-1G&gt;A / c.1393-1G&gt;A</b> | <b>p.? / p.?</b>                               |
| 73 <sup>e</sup> | 1995 | f | Austria     | CIE, no CB                                  | <b>c.308A&gt;C / c.700C&gt;T</b>       | <b>p.(Gln103Pro) / p.(Arg234*)</b>             |
| 74 <sup>f</sup> | 2014 | f | Netherlands | CB                                          | <b>c.1246T&gt;C / c.1889C&gt;T</b>     | <b>p.(Cys416Arg) / p.(Pro630Leu)</b>           |
| 75 <sup>f</sup> | 1990 | f | Netherlands | CB                                          | c.1889C>T / c.1889C>T                  | p.(Pro630Leu) / p.(Pro630Leu)                  |
| 76 <sup>f</sup> | 1984 | f | Netherlands | CB                                          | c.700C>T / c.1889C>T                   | p.(Arg234*) / p.(Pro630Leu)                    |
| 77 <sup>g</sup> | 2013 | m | Finland     | Erythroderma, no CB                         | c.700C>T / c.1889C>T                   | p.(Arg234*) / p.(Pro630Leu)                    |
| 78 <sup>h</sup> | 1961 | f | France      | Erythroderma, no CB                         | c.700C>T / c.700C>T                    | p.(Arg234*) / p.(Arg234*)                      |
| 79 <sup>h</sup> | 1992 | f | France      | Erythroderma, no CB                         | <b>c.1164G&gt;T / c.1164G&gt;T</b>     | <b>p.(Trp388Cys) / p.(Trp388Cys)</b>           |
| 80 <sup>h</sup> | 1991 | f | France      | Erythroderma, no CB                         | <b>c.1202T&gt;A / c.1889C&gt;T</b>     | <b>p.(Leu401Gln) / p.(Pro630Leu)</b>           |
| 81 <sup>h</sup> | 2012 | m | Morocco     | CB                                          | c.1186C>A / c.1186C>A                  | p.(Arg396Ser) / p.(Arg396Ser)                  |
| 82 <sup>h</sup> | 2013 | m | Turkey      | Erythroderma, no CB                         | c.1208A>G / c.1208A>G                  | p.(His403Arg) / p.(His403Arg)                  |
| 83 <sup>i</sup> | 2017 | f | Spain       | n/a                                         | c.1889C>T / <b>deletion exon 15</b>    | p.(Pro630Leu) / <b>p.?</b>                     |

<sup>a</sup>previously published in Jobard *et al.* (2002), <sup>b</sup>patient is identical with patient 10 in Table S1, <sup>c</sup>previously published in Hellström Pigg *et al.* (2016), <sup>d</sup>previously published in Vahlquist *et al.* (2010), <sup>e</sup>patients contributed by R. G. and M. S., <sup>f</sup>patients contributed by v. d. A. and M. C. B., <sup>g</sup>patient contributed by K. H.-J., <sup>h</sup>patients contributed by J. M.-H. and N. J., <sup>i</sup>patient contributed by A. H.-M.. In bold: novel mutations, LI: lamellar ichthyosis, CIE: congenital ichthyosiform erythroderma, SICI: self-improving collodion baby, CB: collodion baby, IV: ichthyosis vulgaris, XLI: X-linked ichthyosis

Table S3: Results of bioinformatic tools for novel mutations in *ALOX12B*

| Mutation     |                    | gnomAD                       | rs number    | ClinVar                   | MutationTaster          | Polyphen-2 (HumVar)       | Provean (cutoff=-2.5) | SIFT (cutoff=0.05) | fathmm            | NNSplice                                           | NetGene2                     | SSP (VarSEAK)                                     |
|--------------|--------------------|------------------------------|--------------|---------------------------|-------------------------|---------------------------|-----------------------|--------------------|-------------------|----------------------------------------------------|------------------------------|---------------------------------------------------|
| c.47C>G      | p.(Ser16Trp)       | n/a                          | n/a          | n/a                       | polymorphism (0.995)    | probably damaging (0.988) | deleterious (-4.20)   | damaging (0.000)   | tolerated (-1.13) | -                                                  | -                            | -                                                 |
| c.47C>T      | p.(Ser16Leu)       | 0x homo, 3x het, MAF 0.001%  | rs147784568  | n/a                       | polymorphism (1.0)      | possibly damaging (0.531) | deleterious (-2.64)   | damaging (0.001)   | tolerated (-1.11) | -                                                  | -                            | -                                                 |
| c.58G>T      | p.(Asp20Tyr)       | n/a                          | n/a          | n/a                       | polymorphism (1.0)      | probably damaging (0.919) | deleterious (-6.60)   | damaging (0.001)   | tolerated (-1.24) | -                                                  | -                            | -                                                 |
| c.67T>C      | p.(Ser23Pro)       | n/a                          | n/a          | n/a                       | disease causing (0.552) | probably damaging (0.992) | deleterious (-3.47)   | damaging (0.032)   | tolerated (-1.12) | -                                                  | -                            | -                                                 |
| c.195_220del | p.(Ile66Argfs*50)  | n/a                          | n/a          | n/a                       | disease causing (1.0)   | -                         | -                     | -                  | -                 | -                                                  | -                            | -                                                 |
| c.208_211dup | p.(Lys71Thrfs*55)  | n/a                          | n/a          | n/a                       | disease causing (1.0)   | -                         | -                     | -                  | -                 | -                                                  | -                            | -                                                 |
| c.297C>A     | p.(Phe99Leu)       | n/a                          | n/a          | n/a                       | disease causing (1.0)   | probably damaging (0.960) | deleterious (-5.59)   | damaging (0.002)   | tolerated (-1.23) | -                                                  | -                            | -                                                 |
| c.299C>T     | p.(Pro100Leu)      | n/a                          | rs1256507861 | n/a                       | disease causing (1.0)   | probably damaging (0.992) | deleterious (-9.31)   | damaging (0.000)   | tolerated (-0.25) | -                                                  | -                            | -                                                 |
| c.307C>T     | p.(Gln103*)        | n/a                          | n/a          | n/a                       | disease causing (1.0)   | -                         | -                     | -                  | -                 | -                                                  | -                            | -                                                 |
| c.325G>T     | p.(Glu109*)        | n/a                          | n/a          | n/a                       | disease causing (1.0)   | -                         | -                     | -                  | -                 | -                                                  | -                            | -                                                 |
| c.341G>A     | p.(Arg114Gln)      | 0x homo, 2x het, MAF 0.0008% | rs745541957  | n/a                       | disease causing (0.661) | possibly damaging (0.532) | neutral (-2.42)       | tolerated (2.81)   | damaging (-2.60)  | -                                                  | -                            | -                                                 |
| c.353-2A>G   | p.?                | 0x homo, 1x het, MAF 0.0004% | rs775524204  | 1x likely pathogenic      | -                       | -                         | -                     | -                  | -                 | Loss of acceptor splice site                       | Loss of acceptor splice site | No AG, loss of function for authentic splice site |
| c.371A>T     | p.(Asp124Val)      | 0x homo, 2x het, MAF 0.0008% | rs138503921  | n/a                       | disease causing (0.676) | possibly damaging (0.697) | deleterious (-6.58)   | damaging (0.000)   | damaging (-2.79)  | -                                                  | -                            | -                                                 |
| c.416_417del | p.(Ala139Glufs*37) | n/a                          | n/a          | n/a                       | disease causing (1.0)   | -                         | -                     | -                  | -                 | -                                                  | -                            | -                                                 |
| c.526G>A     | p.(Glu176Lys)      | 0x homo, 95x het, MAF 0.03%  | rs149039053  | 1x uncertain significance | disease causing (0.635) | benign (0.034)            | neutral (-0.13)       | tolerated (0.108)  | damaging (-2.54)  | No splicing effect (donor site 0.66 wt → 0.90 mut) | No splicing effect           | No splicing effect (Δ+34.78%)                     |
| c.698G>A     | p.(Trp233*)        | n/a                          | n/a          | n/a                       | disease causing (1.0)   | -                         | -                     | -                  | -                 | -                                                  | -                            | -                                                 |

|               |                      |                              |              |                           |                         |                           |                     |                  |                   |                              |                              |                                                   |
|---------------|----------------------|------------------------------|--------------|---------------------------|-------------------------|---------------------------|---------------------|------------------|-------------------|------------------------------|------------------------------|---------------------------------------------------|
| c.734_745del  | p.(Gly245_Ser248del) | n/a                          | n/a          | n/a                       | -                       | -                         | -                   | -                | -                 | -                            | -                            | -                                                 |
| c.769C>G      | p.(His257Asp)        | 0x homo, 1x het, MAF 0.0004% | rs1233776328 | n/a                       | disease causing (0.996) | probably damaging (0.993) | deleterious (-8.27) | damaging (0.004) | damaging (-2.54)  | -                            | -                            | -                                                 |
| c.771_772del  | p.(His257Glnfs*116)  | n/a                          | n/a          | n/a                       | -                       | -                         | -                   | -                | -                 | -                            | -                            | -                                                 |
| c.793G>A      | p.(Gly265Arg)        | n/a                          | n/a          | n/a                       | disease causing (1.0)   | probably damaging (0.998) | deleterious (-5.66) | damaging (0.001) | damaging (-2.86)  | -                            | -                            | -                                                 |
| c.814G>T      | p.(Val272Phe)        | n/a                          | n/a          | n/a                       | polymorphism (1.0)      | possibly damaging (0.732) | deleterious (-2.83) | damaging (0.009) | tolerated (-1.23) | -                            | -                            | -                                                 |
| c.845delinsAA | p.(Arg282Glnfs*92)   | n/a                          | n/a          | n/a                       | -                       | -                         | -                   | -                | -                 | -                            | -                            | -                                                 |
| c.864del      | p.(Val289Serfs*63)   | n/a                          | n/a          | n/a                       | -                       | -                         | -                   | -                | -                 | -                            | -                            | -                                                 |
| c.893T>C      | p.(Leu298Pro)        | n/a                          | n/a          | n/a                       | disease causing (1.0)   | probably damaging (1.000) | deleterious (-5.69) | damaging (0.000) | damaging (-1.83)  | -                            | -                            | -                                                 |
| c.928-1G>C    | p.?                  | n/a                          | n/a          | n/a                       | -                       | -                         | -                   | -                | -                 | Loss of acceptor splice site | Loss of acceptor splice site | No AG, loss of function for authentic splice site |
| c.938T>C      | p.(Ile313Thr)        | n/a                          | rs1197603391 | n/a                       | disease causing (1.0)   | probably damaging (0.987) | deleterious (-4.13) | damaging (0.001) | damaging (-2.84)  | -                            | -                            | -                                                 |
| c.938_941dup  | p.(Ala316Profs*59)   | n/a                          | n/a          | n/a                       | disease causing (1.0)   | -                         | -                   | -                | -                 | -                            | -                            | -                                                 |
| c.1015C>G     | p.(Pro339Ala)        | n/a                          | n/a          | 1x uncertain significance | disease causing (1.0)   | probably damaging (0.999) | deleterious (-7.48) | damaging (0.005) | damaging (-2.86)  | -                            | -                            | -                                                 |
| c.1018del     | p.(Leu340Serfs*12)   | n/a                          | n/a          | n/a                       | -                       | -                         | -                   | -                | -                 | -                            | -                            | -                                                 |
| c.1025T>C     | p.(Leu342Pro)        | n/a                          | n/a          | n/a                       | disease causing (1.0)   | probably damaging (1.000) | deleterious (-6.44) | damaging (0.000) | tolerated (-1.47) | -                            | -                            | -                                                 |
| c.1057C>A     | p.(Pro353Thr)        | n/a                          | n/a          | n/a                       | disease causing (1.0)   | probably damaging (0.999) | deleterious (-7.42) | damaging (0.000) | damaging (-4.55)  | -                            | -                            | -                                                 |
| c.1071+1G>C   | p.?                  | n/a                          | n/a          | n/a                       | -                       | -                         | -                   | -                | -                 | -                            | Loss of donor splice site    | No GT, loss of function for authentic splice site |
| c.1127G>A     | p.(Trp376*)          | n/a                          | n/a          | n/a                       | disease causing (1.0)   | -                         | -                   | -                | -                 | -                            | -                            | -                                                 |
| c.1211T>G     | p.(Leu404Arg)        | n/a                          | n/a          | n/a                       | disease causing (1.0)   | probably damaging (0.998) | deleterious (-5.50) | damaging (0.000) | tolerated (-1.23) | -                            | -                            | -                                                 |





|           |               |                                 |              |     |                          |                              |                        |                     |                     |   |   |   |
|-----------|---------------|---------------------------------|--------------|-----|--------------------------|------------------------------|------------------------|---------------------|---------------------|---|---|---|
| c.2036G>A | p.(Arg679His) | 0x homo, 1x het,<br>MAF 0.0004% | rs397514528  | n/a | disease causing<br>(1.0) | probably damaging<br>(0.999) | deleterious<br>(-4.80) | damaging<br>(0.000) | damaging<br>(-1.50) | - | - | - |
| c.2041A>T | p.(Lys681*)   | n/a                             | n/a          | n/a | disease causing<br>(1.0) | -                            | -                      | -                   | -                   | - | - | - |
| c.2060A>G | p.(Tyr687Cys) | 0x homo, 1x het,<br>MAF 0.0004% | rs1482844053 | n/a | disease causing<br>(1.0) | probably damaging<br>(1.000) | deleterious<br>(-8.64) | damaging<br>(0.000) | damaging<br>(-4.08) | - | - | - |
| c.2064C>G | p.(Tyr688*)   | n/a                             | n/a          | n/a | disease causing<br>(1.0) | -                            | -                      | -                   | -                   | - | - | - |
| c.2094C>A | p.(Ser698Arg) | n/a                             | n/a          | n/a | disease causing<br>(1.0) | probably damaging<br>(0.999) | deleterious<br>(-4.80) | damaging<br>(0.000) | damaging<br>(-3.18) | - | - | - |

n/a: not listed in the database. homo: homozygous. Het: heterozygous. MAF: minor allele frequency. -: not evaluated. wt: wildtype, mut: mutation. Scores are in brackets.

gnomAD: The data set provided on this website spans 125,748 exome sequences and 15,708 whole-genome sequences from unrelated individuals sequenced as part of various disease-specific and population genetic studies.

Mutation Taster: The probability value is the probability of the prediction. A value close to 1 indicates a high security of the prediction.

PolyPhen-2: HumVar prediction, the score ranges from 1.0 (damaging) to 0.0 (benign).

Provean: Cutoff threshold is -2.5. Variants with a score equal to or below -2.5 are considered "deleterious", variants with a score above -2.5 are considered "neutral".

SIFT: Cutoff threshold is 0.05. Substitutions with less than 0.05 are predicted as damaging.

Fathmm: Prediction algorithm: weighted. Scores approximately equal to zero indicate no significant change in the underlying amino acid probabilities, scores less than zero indicate an unfavorable substitution, scores greater than zero indicate a favorable substitution.

NNSplice: Splice site predictions for 1 sequence with donor score cutoff 0.40, acceptor score cutoff 0.40. Score ranging from 0 to 1, higher score implies a more potential splice site.

NetGene2: Cutoff values used for confidence: highly confident donor sites (H): 95.0 %, nearly all true donor sites: 50.0 %, highly confident acceptor sites (H): 95.0 %, nearly all true acceptor sites: 20.0 %. Confidence score ranging from 0 to 1, higher score implies a higher confidence of true site.

SSP (VarSEAK): Score: Prediction of the likelihood of a splice site being functional (positive values) or nonfunctional (negative values), reaching from -100% to +100%. ΔScore (DeltaScore): the difference between the score of the splice site on the reference sequence and the score of the splice site on the variant sequence.



Table S4: Results of bioinformatic tools for novel mutations in *ALOXE3*

| Mutation   |                    | gnomAD                        | rs number        | ClinVar       | MutationTaster          | Polyphen-2 (HumVar)       | Provean (cutoff=-2.5) | SIFT (cutoff=0.05) | fathmm            | NNSplice                                                                   | NetGene2                                                                                             | SSP (VarSEAK)                                                                                                  |
|------------|--------------------|-------------------------------|------------------|---------------|-------------------------|---------------------------|-----------------------|--------------------|-------------------|----------------------------------------------------------------------------|------------------------------------------------------------------------------------------------------|----------------------------------------------------------------------------------------------------------------|
| c.57_63del | p.(Asp20Serfs*17)  | n/a                           | n/a              | n/a           | disease causing (1.0)   | -                         | -                     | -                  | -                 | -                                                                          | -                                                                                                    | -                                                                                                              |
| c.271G>T   | p.(Glu91*)         | 0x homo, 2x het, MAF 0.0007%  | rs367827093      | n/a           | disease causing (1.0)   | -                         | -                     | -                  | -                 | -                                                                          | -                                                                                                    | -                                                                                                              |
| c.308A>C   | p.(Gln103Pro)      | n/a                           | n/a              | n/a           | disease causing (0.999) | probably damaging (0.986) | deleterious (-4.59)   | damaging (0.008)   | tolerated (-0.17) | -                                                                          | -                                                                                                    | -                                                                                                              |
| c.397A>G   | p.(Arg133Gly)      | 0x homo, 9x het, MAF 0.0036%  | rs373520842      | n/a           | disease causing (0.999) | probably damaging (0.992) | deleterious (-6.03)   | damaging (0.001)   | damaging (-2.50)  | -                                                                          | -                                                                                                    | -                                                                                                              |
| c.680+1G>A | p.?                | 0x homo, 1x het, MAF 0.0004%  | rs764781178      | 1x pathogenic | -                       | -                         | -                     | -                  | -                 | Loss of donor splice site                                                  | Loss of donor splice site                                                                            | No GT, loss of function for authentic splice site                                                              |
| c.758del   | p.(Phe253Serfs*27) | n/a                           | n/a              | n/a           | disease causing (1.0)   | -                         | -                     | -                  | -                 | -                                                                          | -                                                                                                    | -                                                                                                              |
| c.833A>C   | p.(Tyr278Ser)      | n/a                           | n/a              | n/a           | disease causing (0.997) | probably damaging (0.930) | deleterious (-6.63)   | damaging (0.000)   | tolerated (-0.98) | -                                                                          | -                                                                                                    | -                                                                                                              |
| c.923T>C   | p.(Leu308Pro)      | 0x homo, 4x het, MAF 0.0016%  | rs764052154      | n/a           | disease causing (0.999) | probably damaging (1.000) | deleterious (-6.21)   | damaging (0.002)   | damaging (-1.83)  | -                                                                          | -                                                                                                    | -                                                                                                              |
| c.952dup   | p.(Leu318Profs*58) | 0x homo, 1x het, MAF 0.0032%  | rs147208742<br>1 | n/a           | disease causing (1.0)   | -                         | -                     | -                  | -                 | -                                                                          | -                                                                                                    | -                                                                                                              |
| c.957G>A   | p.(Glu319=)        | 0x homo, 1x het, MAF 0.0004%  | rs142777070<br>3 | n/a           | disease causing (1.0)   | -                         | neutral (0.00)        | tolerated (1.000)  | -                 | Loss of authentic donor splice site, use of a cryptic site 4 nt downstream | Reduced score for donor splice site (wt 0.95 → mut 0.70). Cryptic splice site 4 nt downstream (0.95) | Strong decrease of score for authentic splice site ( $\Delta$ - 61.89%). Use of a cryptic site 4 nt downstream |
| c.1031A>C  | p.(Gln344Pro)      | 0x homo, 13x het, MAF 0.0052% | rs142781546      | n/a           | disease causing (1.0)   | probably damaging (0.999) | deleterious (-5.33)   | damaging (0.002)   | damaging (-2.73)  | -                                                                          | -                                                                                                    | -                                                                                                              |
| c.1061G>A  | p.(Trp354*)        | n/a                           | rs767046669      | n/a           | disease causing (1.0)   | -                         | -                     | -                  | -                 | -                                                                          | -                                                                                                    | -                                                                                                              |
| c.1164G>T  | p.(Trp388Cys)      | n/a                           | n/a              | n/a           | disease causing (1.0)   | probably damaging (1.000) | deleterious (-12.4)   | damaging (0.000)   | damaging (-5.73)  | -                                                                          | -                                                                                                    | -                                                                                                              |

|                   |                    |                              |                  |                 |                         |                           |                     |                   |                   |                              |                              |                                                   |
|-------------------|--------------------|------------------------------|------------------|-----------------|-------------------------|---------------------------|---------------------|-------------------|-------------------|------------------------------|------------------------------|---------------------------------------------------|
| c.1193C>T         | p.(Ser398Phe)      | n/a                          | n/a              | n/a             | disease causing (0.650) | possibly damaging (0.760) | deleterious (-3.88) | damaging (0.000)  | tolerated (-1.19) | -                            | -                            | -                                                 |
| c.1202T>A         | p.(Leu401Gln)      | 0x homo, 1x het. MAF 0.0004% | rs761241768      | n/a             | disease causing (0.732) | benign (0.261)            | neutral (-0.40)     | tolerated (0.313) | tolerated (-0.94) | -                            | -                            | -                                                 |
| c.1246T>C         | p.(Cys416Arg)      | n/a                          | n/a              | n/a             | disease causing (1.0)   | benign (0.012)            | neutral (-1.99)     | damaging (0.021)  | tolerated (-0.98) | -                            | -                            | -                                                 |
| c.1292dup         | p.(His431Glnfs*90) | 0x homo, 1x het, MAF 0.0004% | rs156799943<br>1 | n/a             | disease causing (1.0)   | -                         | -                   | -                 | -                 | -                            | -                            | -                                                 |
| c.1393-1G>A       | p.?                | n/a                          | n/a              | n/a             | -                       | -                         | -                   | -                 | -                 | Loss of acceptor splice site | Loss of acceptor splice site | No AG, loss of function for authentic splice site |
| c.1786-2A>G       | p.?                | 0x homo, 4x het, MAF 0.0016% | rs139375856      | 1x pathogenic   | -                       | -                         | -                   | -                 | -                 | -                            | -                            | No AG, loss of function for authentic splice site |
| c.1786-63_1807del | p.?                | n/a                          | n/a              | n/a             | -                       | -                         | -                   | -                 | -                 | -                            | -                            | -                                                 |
| c.1804dup         | p.(Met602Asnfs*30) | n/a                          | n/a              | n/a             | disease causing (1.0)   | -                         | -                   | -                 | -                 | -                            | -                            | -                                                 |
| c.1812T>A         | p.(Asn604Lys)      | n/a                          | n/a              | n/a             | disease causing (0.996) | probably damaging (0.997) | deleterious (-5.78) | damaging (0.001)  | damaging (-1.93)  | -                            | -                            | -                                                 |
| c.1937_1944del    | p.(Ser646Thrfs*13) | n/a                          | n/a              | n/a             | disease causing (1.0)   | -                         | -                   | -                 | -                 | -                            | -                            | -                                                 |
| c.1954C>T         | p.(Gln652*)        | 0x homo, 1x het, MAF 0.0004% | rs116328086<br>6 | 1x not provided | disease causing (1.0)   | -                         | -                   | -                 | -                 | -                            | -                            | -                                                 |
| deletion exon 15  | p.? gross deletion | -                            | -                | -               | -                       | -                         | -                   | -                 | -                 | -                            | -                            | -                                                 |

n/a: not listed in the database. homo: homozygous. het: heterozygous. MAF: minor allele frequency. -: not evaluated. nt: nucleotides. wt: wildtype, mut: mutation. Scores are in brackets.

gnomAD: The data set provided on this website spans 125,748 exome sequences and 15,708 whole-genome sequences from unrelated individuals sequenced as part of various disease-specific and population genetic studies.

Mutation Taster: The probability value is the probability of the prediction. A value close to 1 indicates a high security of the prediction.

PolyPhen-2: HumVar prediction, the score ranges from 1.0 (damaging) to 0.0 (benign).

Provean: Cutoff threshold is -2.5. Variants with a score equal to or below -2.5 are considered "deleterious", variants with a score above -2.5 are considered "neutral".

SIFT: Cutoff threshold is 0.05. Substitutions with less than 0.05 are predicted as damaging.

Fathmm: Prediction algorithm: weighted. Scores approximately equal to zero indicate no significant change in the underlying amino acid probabilities, scores less than zero indicate an unfavorable substitution, scores greater than zero indicate a favorable substitution.

NNSplice: Splice site predictions for 1 sequence with donor score cutoff 0.40, acceptor score cutoff 0.40. Score ranging from 0 to 1, higher score implies a more potential splice site.

NetGene2: Cutoff values used for confidence: highly confident donor sites (H): 95.0 %, nearly all true donor sites: 50.0 %, highly confident acceptor sites (H): 95.0 %, nearly all true acceptor sites: 20.0 %. Confidence score ranging from 0 to 1, higher score implies a higher confidence of true site.

SSP (VarSEAK): Score: Prediction of the likelihood of a splice site being functional (positive values) or nonfunctional (negative values), reaching from -100% to +100%. ΔScore (DeltaScore): the difference between the score of the splice site on the reference sequence and the score of the splice site on the variant sequence.

Table S5: Distribution of mutations in *ALOX12B* and *ALOXE3**ALOX12B*:

| Exon | Amino acids | Number of amino acids | Number of missense mutations | Number of all mutations | Number of amino acids divided by the number of missense mutations | Number of amino acids divided by the number of all mutations | Number of missense variants in gnomAD | Number of amino acids divided by the number of missense variants in gnomAD |
|------|-------------|-----------------------|------------------------------|-------------------------|-------------------------------------------------------------------|--------------------------------------------------------------|---------------------------------------|----------------------------------------------------------------------------|
| 1    | 1-49        | 49                    | 6                            | 8                       | 8.2                                                               | 6.13                                                         | 19                                    | 2.58                                                                       |
| 2    | 50-117      | 68                    | 8                            | 13                      | 8.5                                                               | 5.23                                                         | 52                                    | 1.31                                                                       |
| 3    | 118-144     | 27                    | 3                            | 6                       | 9                                                                 | 4.5                                                          | 11                                    | 2.45                                                                       |
| 4    | 145-175     | 31                    | 1                            | 4                       | 31                                                                | 7.75                                                         | 24                                    | 1.29                                                                       |
| 5    | 176-216     | 41                    | 1                            | 4                       | 41                                                                | 10.25                                                        | 12                                    | 3.41                                                                       |
| 6    | 217-251     | 35                    | 1                            | 2                       | 35                                                                | 11.67                                                        | 13                                    | 2.69                                                                       |
| 7    | 252-309     | 58                    | 6                            | 9                       | 9.67                                                              | 6.44                                                         | 36                                    | 1.61                                                                       |
| 8    | 310-357     | 48                    | 7                            | 16                      | 6.86                                                              | 3                                                            | 19                                    | 2.53                                                                       |
| 9    | 358-425     | 68                    | 16                           | 20                      | 4.25                                                              | 3.4                                                          | 27                                    | 2.52                                                                       |
| 10   | 426-454     | 29                    | 8                            | 11                      | 3.63                                                              | 2.64                                                         | 19                                    | 1.53                                                                       |
| 11   | 455-510     | 56                    | 12                           | 14                      | 4.67                                                              | 4                                                            | 32                                    | 1.75                                                                       |
| 12   | 511-551     | 41                    | 9                            | 13                      | 4.56                                                              | 3.15                                                         | 24                                    | 1.71                                                                       |
| 13   | 552-585     | 34                    | 7                            | 12                      | 4.86                                                              | 2.83                                                         | 9                                     | 3.78                                                                       |
| 14   | 586-642     | 57                    | 9                            | 11                      | 6.33                                                              | 5.18                                                         | 25                                    | 2.28                                                                       |
| 15   | 643-701     | 59                    | 9                            | 15                      | 6.5                                                               | 3.69                                                         | 29                                    | 2.03                                                                       |

*ALOXE3*:

| Exon | Amino acids | Number of amino acids | Number of missense mutations | Number of all mutations | Number of amino acids divided by the number of missense mutations | Number of amino acids divided by the number of all mutations | Number of missense variants in gnomAD | Number of amino acids divided by the number of missense variants in gnomAD |
|------|-------------|-----------------------|------------------------------|-------------------------|-------------------------------------------------------------------|--------------------------------------------------------------|---------------------------------------|----------------------------------------------------------------------------|
| 2    | 1-49        | 49                    | 0                            | 2                       | -                                                                 | 24.5                                                         | 19                                    | 2.58                                                                       |
| 3    | 50-117      | 68                    | 1                            | 5                       | 68                                                                | 13.6                                                         | 48                                    | 1.42                                                                       |
| 4    | 118-144     | 27                    | 1                            | 3                       | 27                                                                | 9                                                            | 17                                    | 1.59                                                                       |
| 5    | 145-184     | 40                    | 0                            | 0                       | -                                                                 | -                                                            | 25                                    | 1.6                                                                        |
| 6    | 185-226     | 42                    | 0                            | 2                       | -                                                                 | 21                                                           | 37                                    | 1.14                                                                       |
| 7    | 227-261     | 35                    | 0                            | 3                       | -                                                                 | 11.67                                                        | 19                                    | 1.84                                                                       |
| 8    | 262-319     | 58                    | 4                            | 7                       | 14.5                                                              | 8.29                                                         | 31                                    | 1.87                                                                       |
| 9    | 320-367     | 48                    | 1                            | 3                       | 48                                                                | 16                                                           | 35                                    | 1.37                                                                       |
| 10   | 368-435     | 68                    | 7                            | 11                      | 9.71                                                              | 6.18                                                         | 32                                    | 2.13                                                                       |
| 11   | 436-464     | 29                    | 1                            | 2                       | 29                                                                | 14.5                                                         | 11                                    | 2.64                                                                       |
| 12   | 465-520     | 56                    | 1                            | 2                       | 56                                                                | 28                                                           | 45                                    | 1.24                                                                       |
| 13   | 521-561     | 41                    | 0                            | 1                       | -                                                                 | 41                                                           | 27                                    | 1.52                                                                       |
| 14   | 562-595     | 34                    | 0                            | 0                       | -                                                                 | -                                                            | 23                                    | 1.48                                                                       |
| 15   | 596-652     | 57                    | 2                            | 6                       | 28.5                                                              | 9.5                                                          | 29                                    | 1.97                                                                       |
| 16   | 653-711     | 59                    | 0                            | 2                       | -                                                                 | 29.5                                                         | 38                                    | 1.55                                                                       |

Amino acids beginning at the end of an exon were assigned to the next exon. Large deletions, in frame variants and start loss variants were not included.
